# Supplementary material for: Selective inhibition of histone deacetylase 2 induces p53-dependent survivin downregulation through MDM2 proteasomal degradation
Source: PubMed Central journal article supplement (PMC4694920; doi:10.18632/oncotarget.3100), 2014-12-31

**Fig.1A**

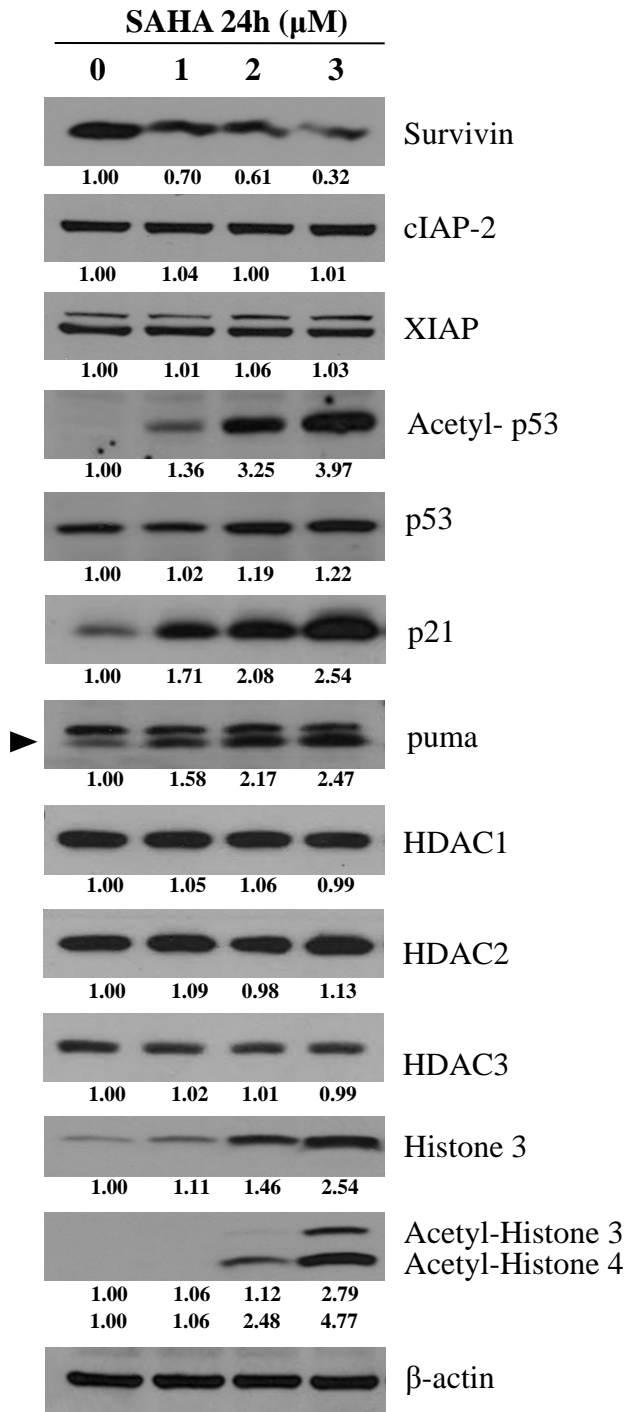

**Fig.1C**

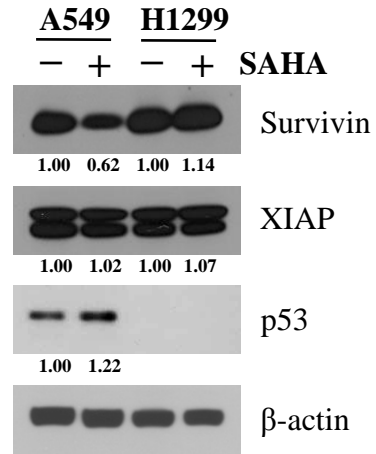

**Fig.1D**

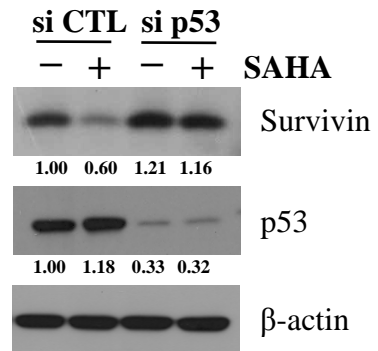

**Fig.1E**

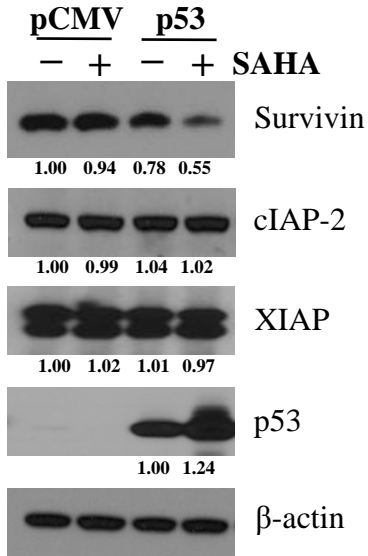

**Fig.1G**

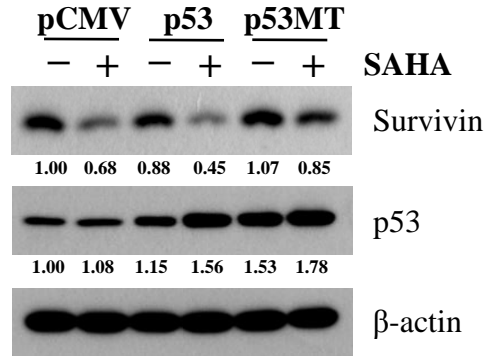

**Fig.1F**

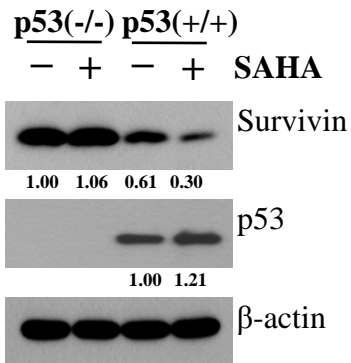

**Fig.2A**

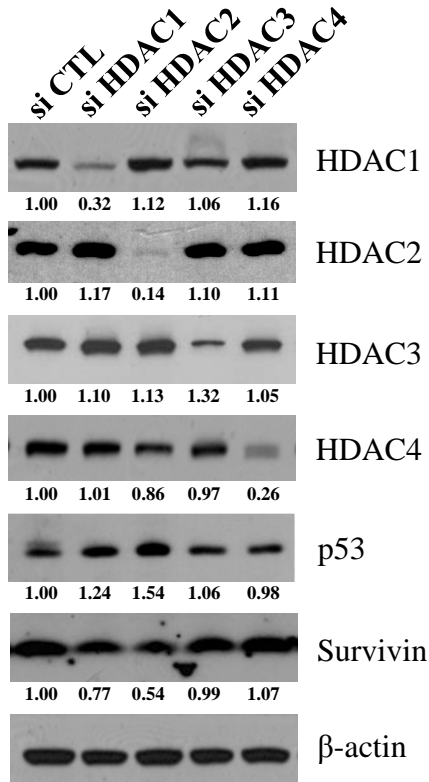

**Fig.2C**

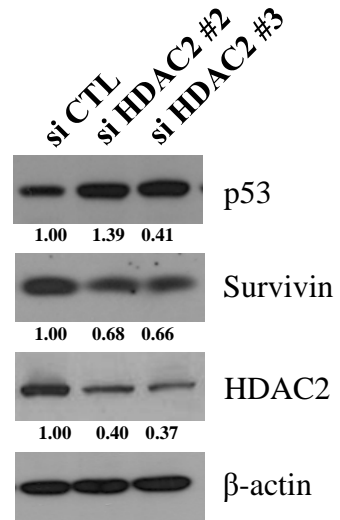

**Fig.2B**

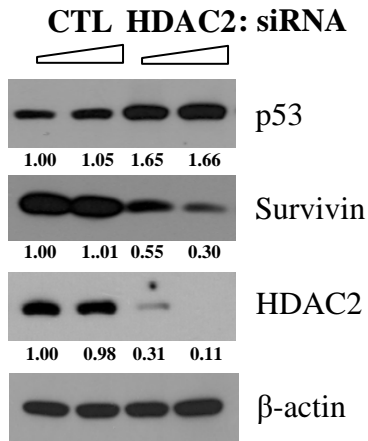

**Fig.2D**

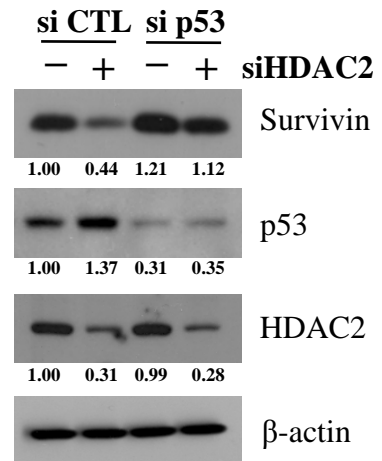

Supplement: oncotarget-06-26528-s001.pdf [file oncotarget-06-26528-s001.pdf]
