# Supplementary material for: Selective inhibition of histone deacetylase 2 induces p53-dependent survivin downregulation through MDM2 proteasomal degradation
Source: PubMed Central journal article supplement (PMC4694920; doi:10.18632/oncotarget.3100), 2014-12-31

**Fig.3A**

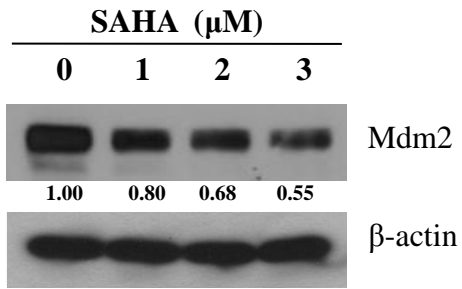

**Fig.3D**

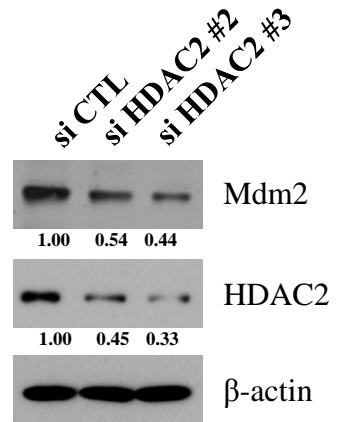

**Fig.3B**

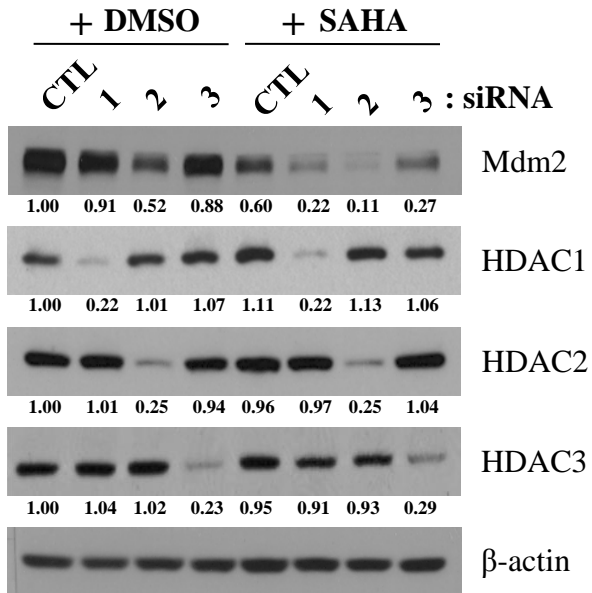

**Fig.3C**

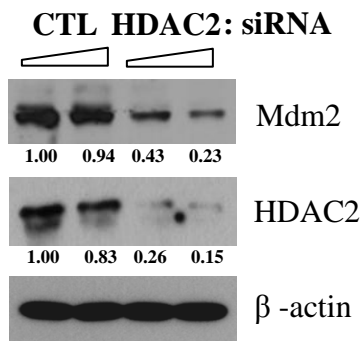

**Fig.5A**

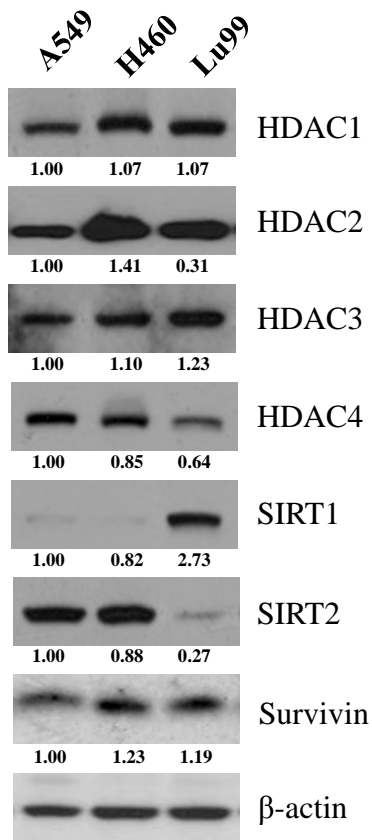

**Fig.6C**

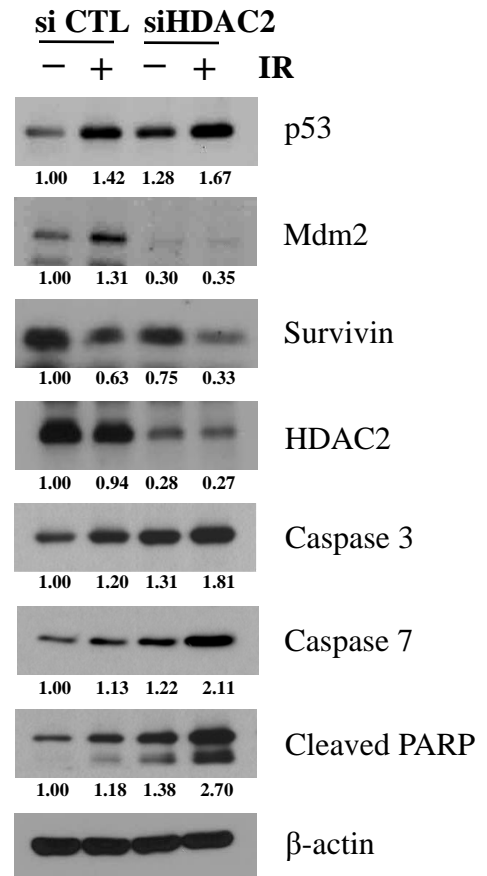

**Fig.6D**

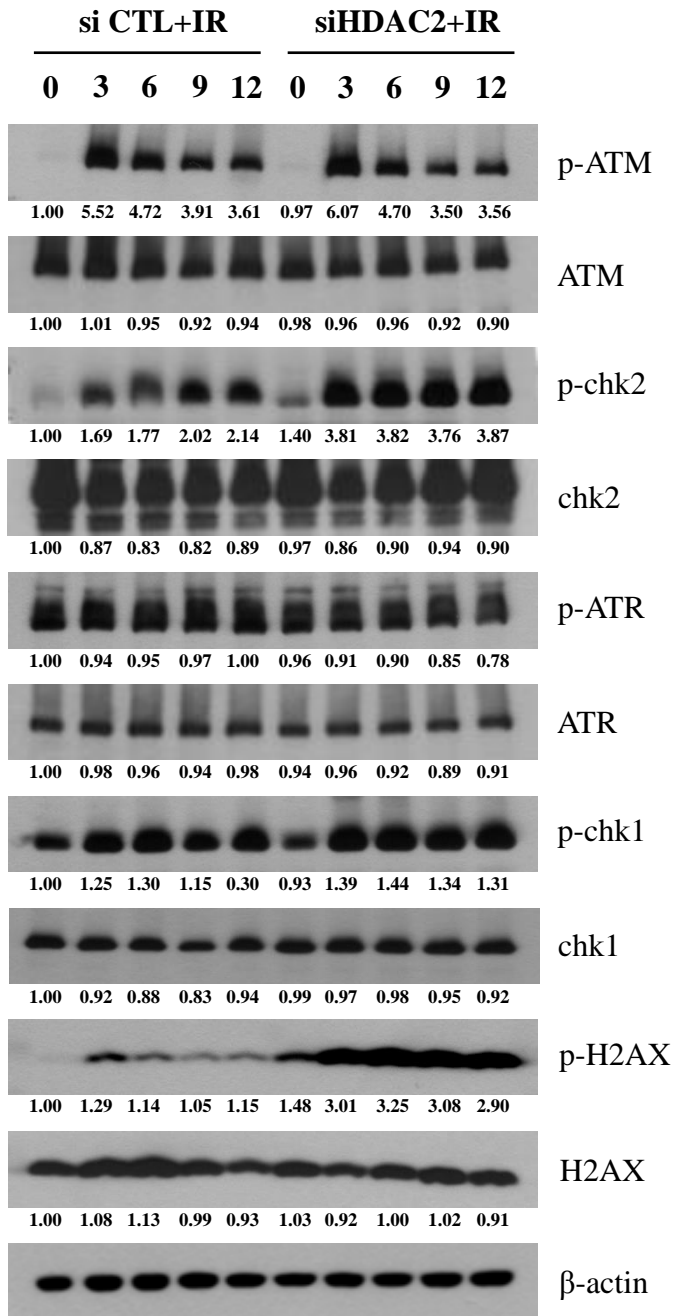

Supplement: oncotarget-06-26528-s002.pdf [file oncotarget-06-26528-s002.pdf]
